# Supplementary material for: SOX9 maintains human foetal lung tip progenitor state by enhancing WNT and RTK signalling
Source: PubMed Central journal article supplement (PMC9627674; doi:10.15252/embj.2022111338), 2022-09-19
Supplement: EMBJ-41-e111338-s017.pdf [file EMBJ-41-e111338-s017.pdf]

## Expanded View Figures

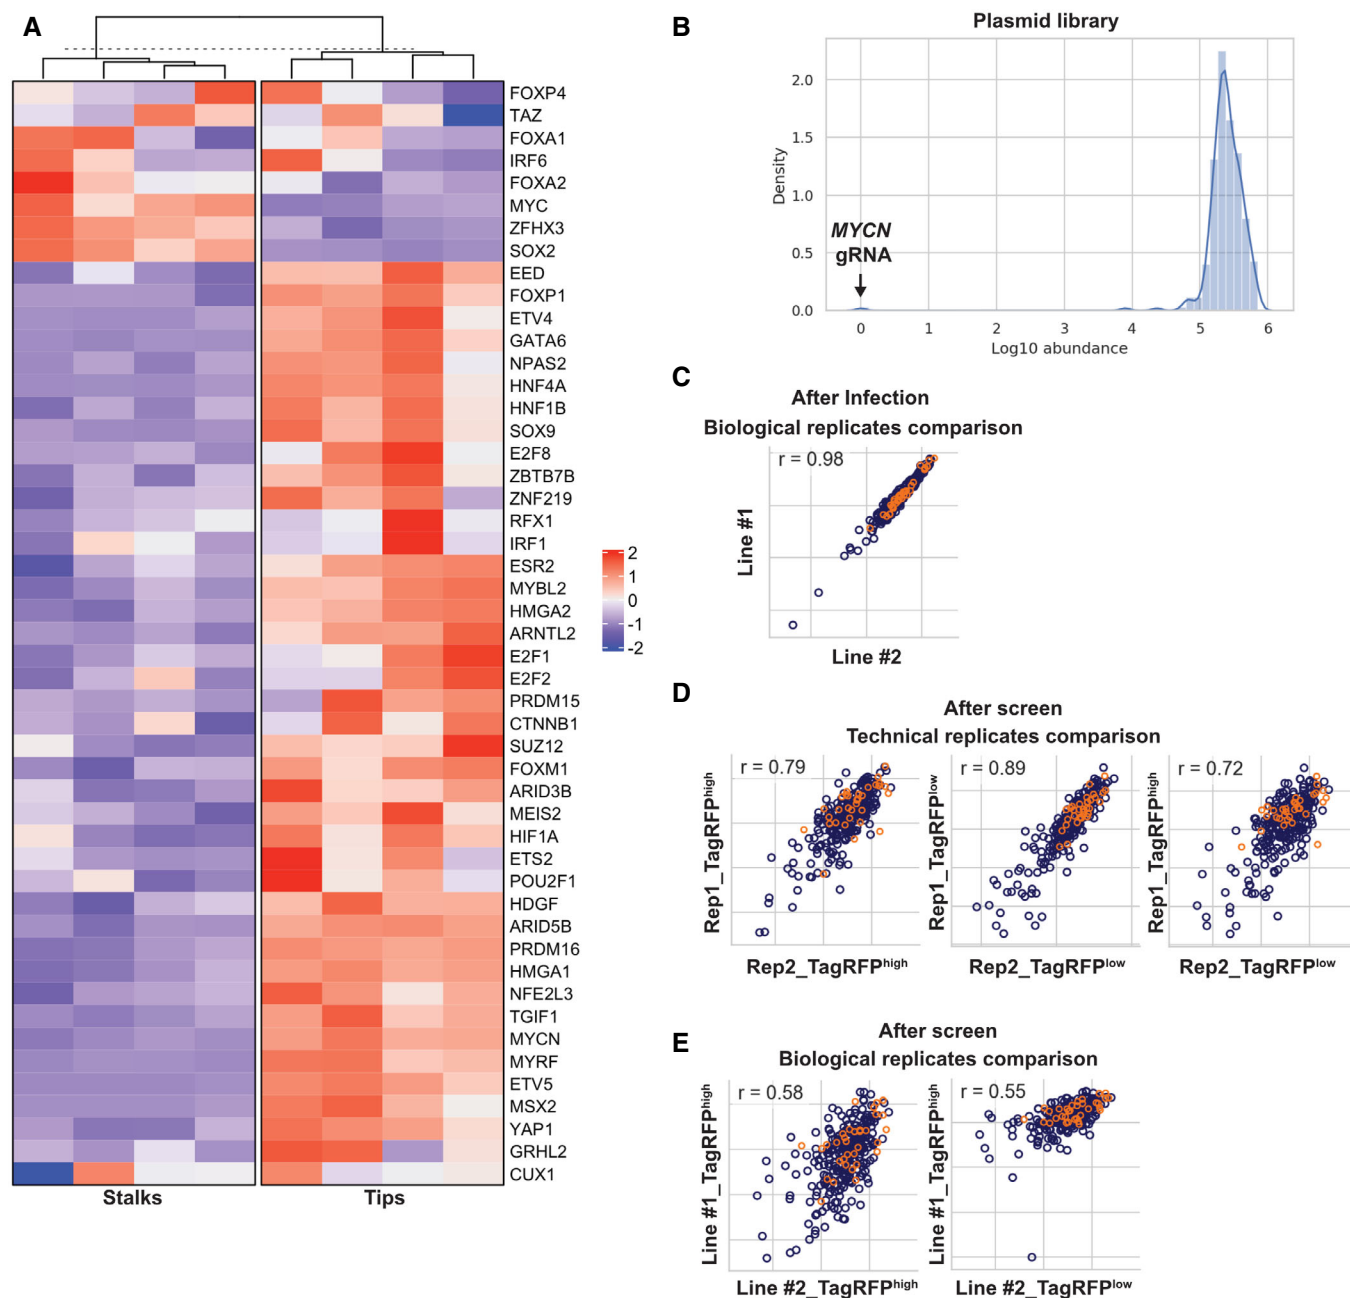

**Figure EV1. CRISPRi screen quality control.**

- A Expression levels heatmap of the selected transcription factors in the developing human foetal lung tip progenitor and stalk cells. Data from Nikolić *et al* (2017).
- B gRNA abundance distribution of the CRISPRi library after cloning into the plasmid vector. One gRNA targeting *MYCN* was missing; likely due to a gRNA synthesis issue.
- C Pearson correlation of gRNA abundance between different samples indicated in axes. Between two independent CRISPRi parental lines 3 day after lentiviral transduction.  $R = 0.98$  indicated great consistency of lentiviral transduction.
- D Pearson correlation of gRNA abundance between technical replicates (Rep1 and Rep2). Great consistency was observed between TagRFP<sup>high</sup> and TagRFP<sup>low</sup> populations.
- E Pearson correlation of gRNA abundance between biological replicates. A lower correlation was observed reflecting the variation of human tissue samples.
- Data information: Orange circles in (C–E) represent non-targeting control gRNAs.

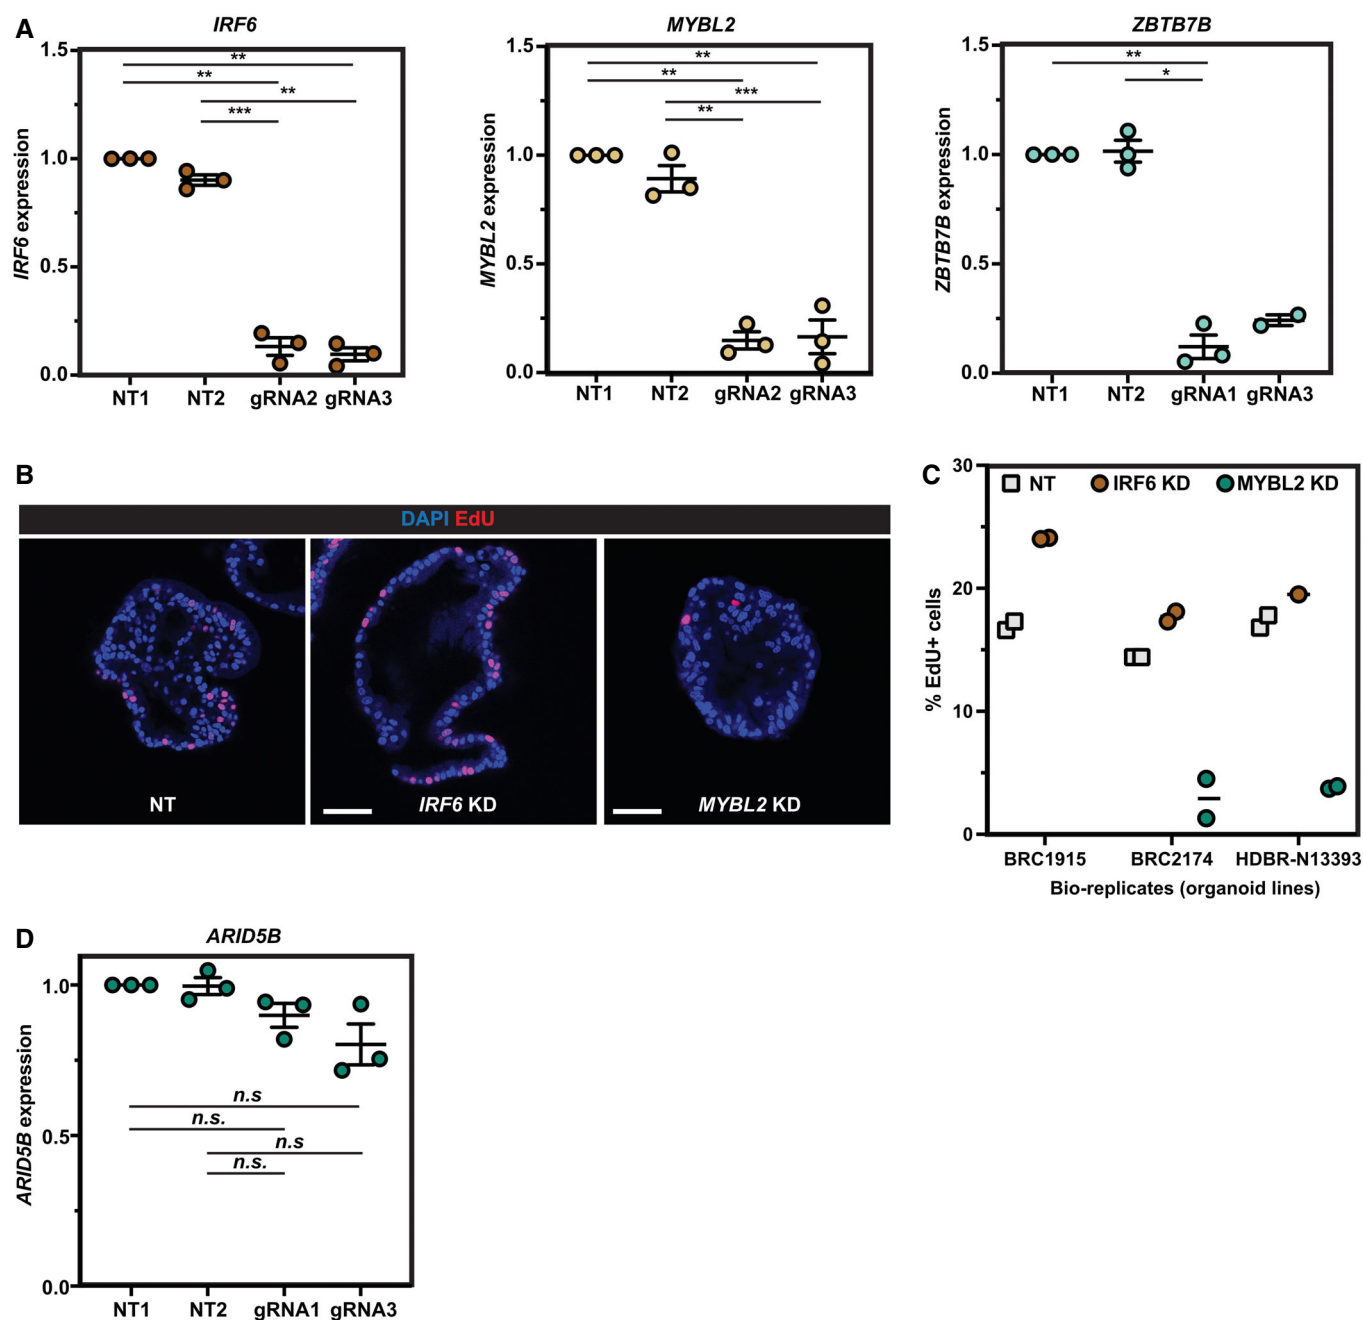

**Figure EV2. Validation of the CRISPRi screen results.**

A qRT-PCR results showing the targeted genes (*IRF6*, *MYBL2* and *ZBTB7B*) were efficiently knocked down by the inducible CRISPRi system using the gRNAs selected from the CRISPRi gRNA library.

B Representative EdU staining images of non-targeting gRNA control and *IRF6* or *MYBL2* knock-down experiments.

C Quantification of the percentage of EdU<sup>+</sup> cells in each of three parental organoid lines used with non-targeting control, *IRF6* knock-down and *MYBL2* knock-down.  $n = 1,649, 1,705, 3,548$  cells were scored for NT controls.  $n = 2,517, 950,$  and  $1,313$  cells were scored for *IRF6* gRNAs.  $n = 1,098$  and  $1,306$  cells were scored for *MYBL2* gRNAs.

D qRT-PCR results showing *ARID5B* was not knocked down by the inducible CRISPRi system using the gRNAs selected from the CRISPRi gRNA library.

Data information: Error bars: mean  $\pm$  SEM. Statistical analysis was using the two-tailed paired *t*-test. *P*-values are reported as follows: \**P* < 0.05, \*\**P* < 0.01, \*\*\**P* < 0.001 and n.s. non-significant. *N* = 3 organoid lines (biological replicates) used for each panel.

Source data are available online for this figure.

**Figure EV3. SOX2 and SOX9 knock-down resulted in different transcriptome changes.**

- A Unsupervised hierarchical clustering of non-targeting control, *SOX2* knock-down and *SOX9* knock-down RNA-Seq results.
- B Venn diagram showing minimal overlap of differentially expressed genes after *SOX2* knock-down in two different parental organoid lines. Overlapping DE genes were labelled in boxes.
- C qPCR of selected DE genes from *SOX9* RNA-seq data following *SOX9* knock-down in a further 2 independent organoid lines. Cells harvested 5 days after knock-down. Error bars: mean  $\pm$  SEM. Statistical analysis was using the two-tailed paired *t*-test. *P*-values are reported as follows: \*\**P* < 0.01, \*\*\**P* < 0.001. *N* = 3 bio-replicates (Organoid line BRC2174 with two different NT gRNAs and two different *SOX9* gRNAs, and Organoid line BRC2136 with 1 NT gRNA and 1 *SOX9* gRNA) were used.
- D Sashimi plot to visualise splicing junction of NT control and *SOX9* KD. Upper panel: Sashimi plot was used to visualise splicing junction information in non-targeting gRNA control and *SOX9* knock-down groups. Junctional reads between intron #1 and exon #2 were only observed in *SOX9* knock-down groups and not in non-targeting gRNA control groups. Lower panel: major *SOX9* domains in relation to the *SOX9* genomic locus. Exon #1 contains DIM and part of the HMG domain. DIM, dimerization domain. HMG, high-mobility group domain. PQA, proline-glutamine-alanine repeats domain. TA, transactivation domain.
- E Heatmap of gene expression from representative GO terms: cell division and small molecule metabolism together with gene expression of upregulated non-lung lineage genes. OL, organoid line.
- F Selected GO enrichment in DE genes after *SOX9* knock-down.

Source data are available online for this figure.

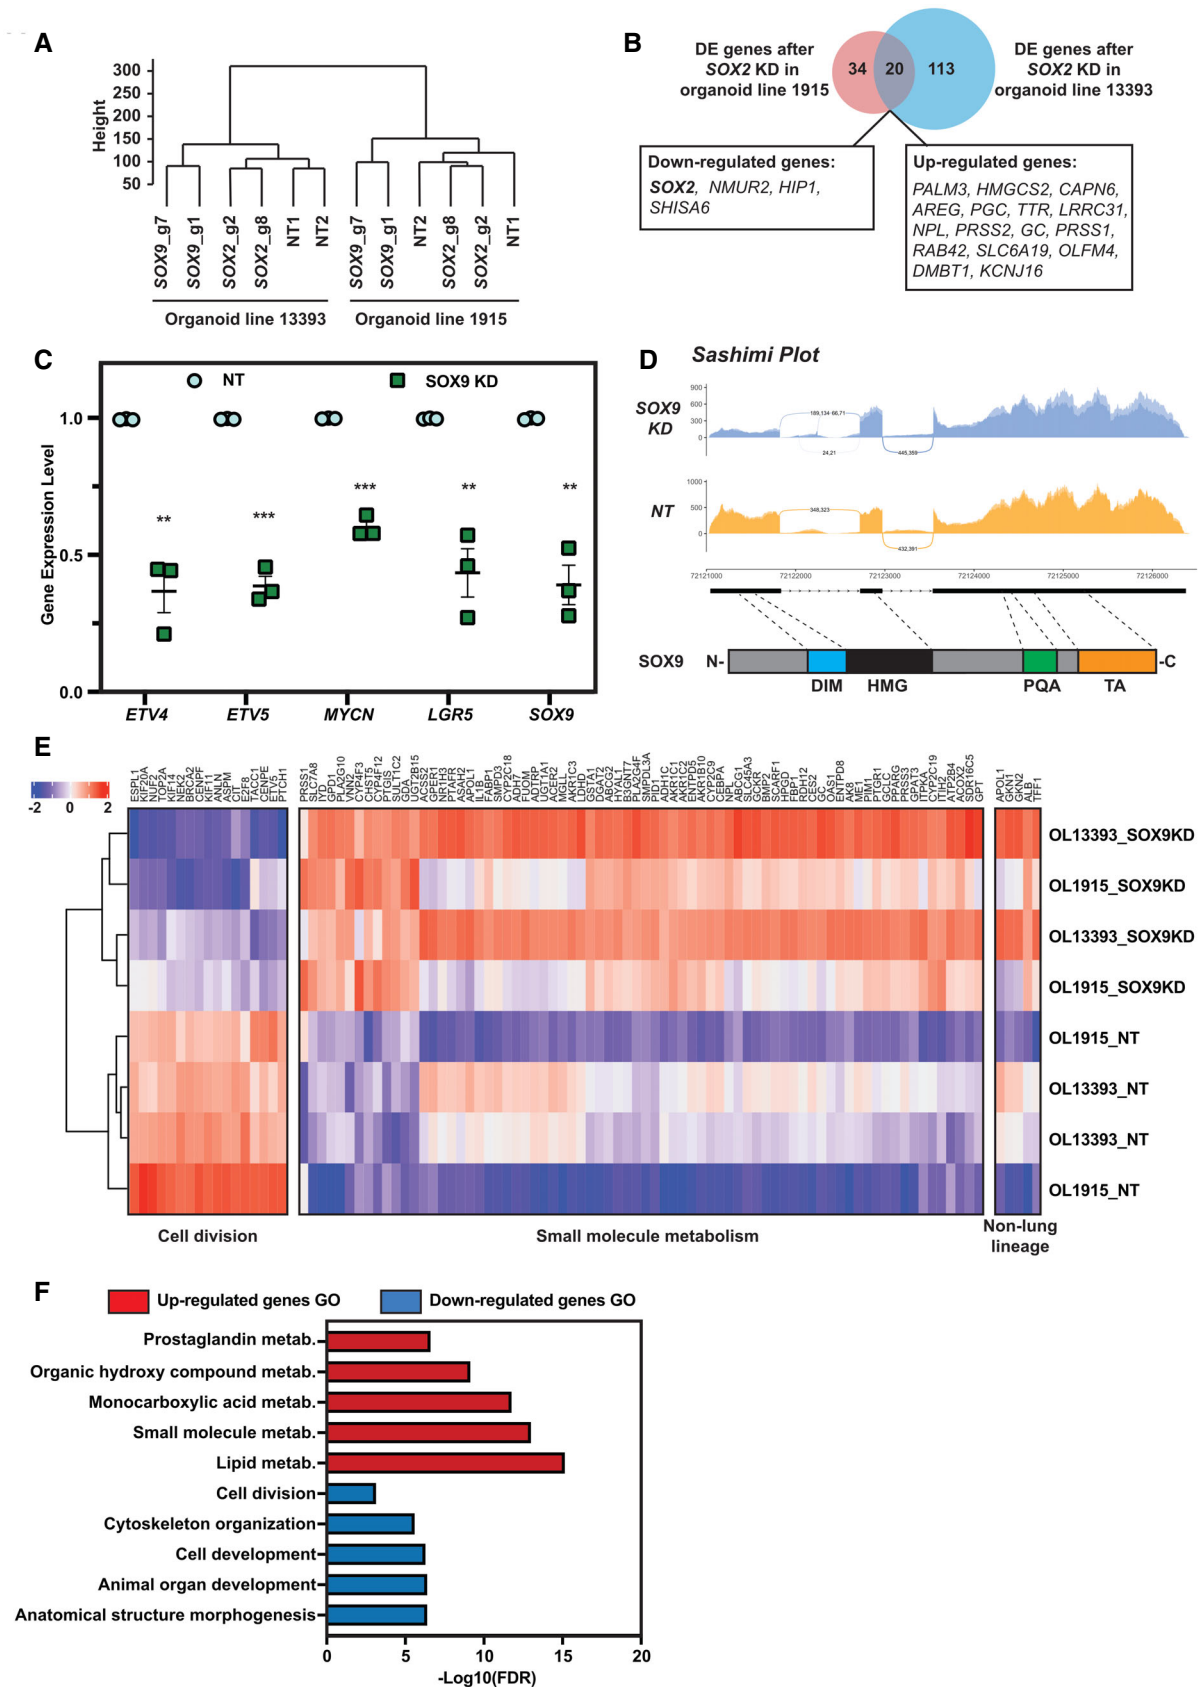

Figure EV3.

**Figure EV4. SOX9 directly activates tip cell genes and represses secretory cell genes.**

- A Summary of enriched TF binding motifs in SOX9 TaDa peaks. The SOX motif was enriched, indicating the SOX9 TaDa faithfully identified SOX9 binding sites across the genome.
- B SOX9 direct transcriptional target enrichment in human foetal lung scRNA-seq data. All SOX9 direct transcriptional targets were used for scoring. Similar to Fig 2H, SOX9 directly activated targets were enriched in tip progenitor cells (left panel), whereas SOX9 directly repressed targets were enriched in secretory cell lineages (right panel).
- C *SHH* was co-expressed with *SOX9* in human foetal lung tip progenitor cells. *SOX9* in yellow and *SHH* in red. No-probe controls are shown in the right panel.
- D *LEF1* and *WIF1* were co-expressed with *SOX9* in human foetal lung tip progenitor cells. *SOX9* in red and *LEF1* (left panel) and *WIF1* (right panel) in yellow.
- E Lentiviral construct design for overexpressing *SOX9* in human foetal lung progenitor cells.
- F Representative images showing organoid morphology does not change after 3 days of *SOX9* overexpression. *SOX9* overexpressed organoid indicated with arrow.
- G qRT-PCR results showing that 3 days of *SOX9* overexpression led to *ETV5* and *MYCN* transcription being significantly upregulated, however, *ETV4* and *CFTR* were not changed.  $N = 4$  organoid lines (bio-replicates) were used. Error bars: mean  $\pm$  SEM. Two-tailed Student's *t*-tests were performed. *P*-values are reported as follows: \* $P < 0.05$ ; \*\*\* $P < 0.001$ .

Data information: Scale bars denote 50  $\mu\text{m}$  (C, D) and 100  $\mu\text{m}$  (F).

Source data are available online for this figure.

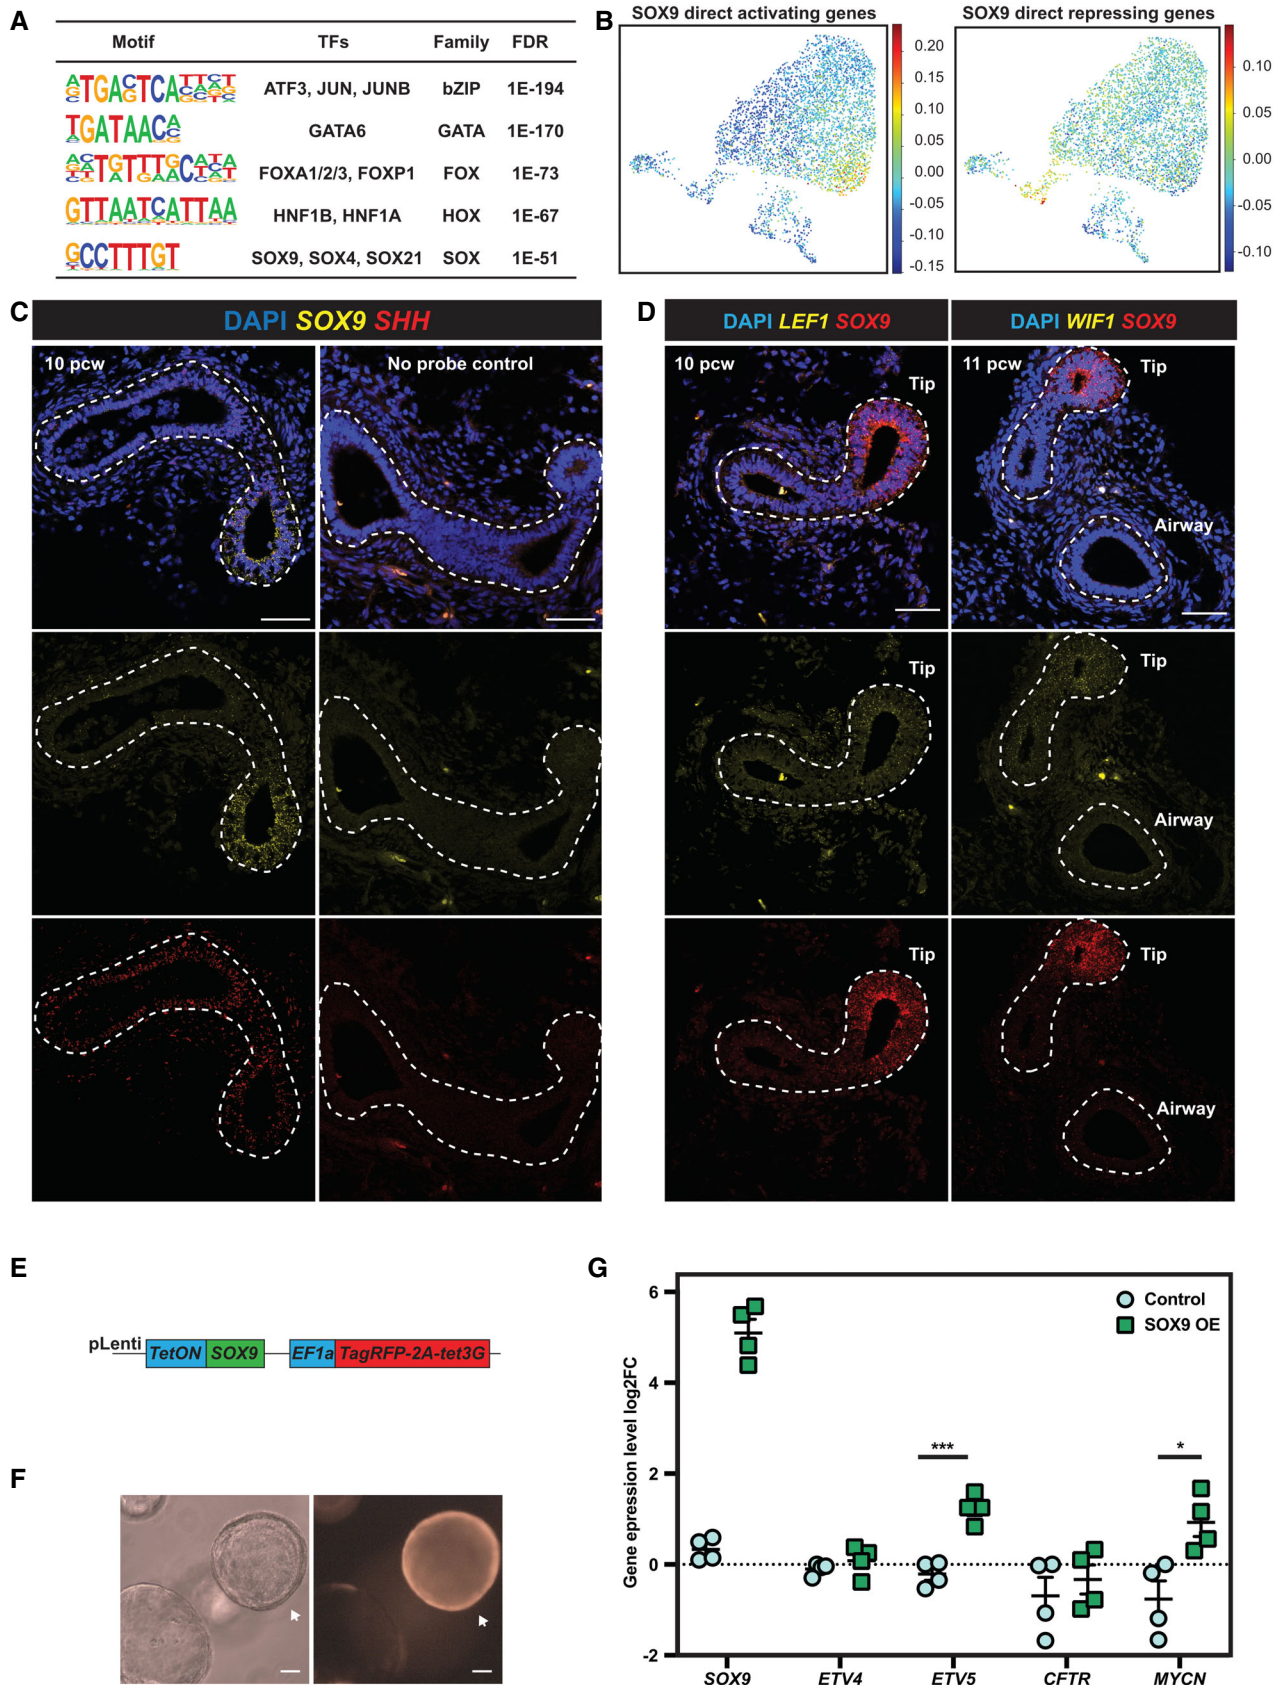

Figure EV4.

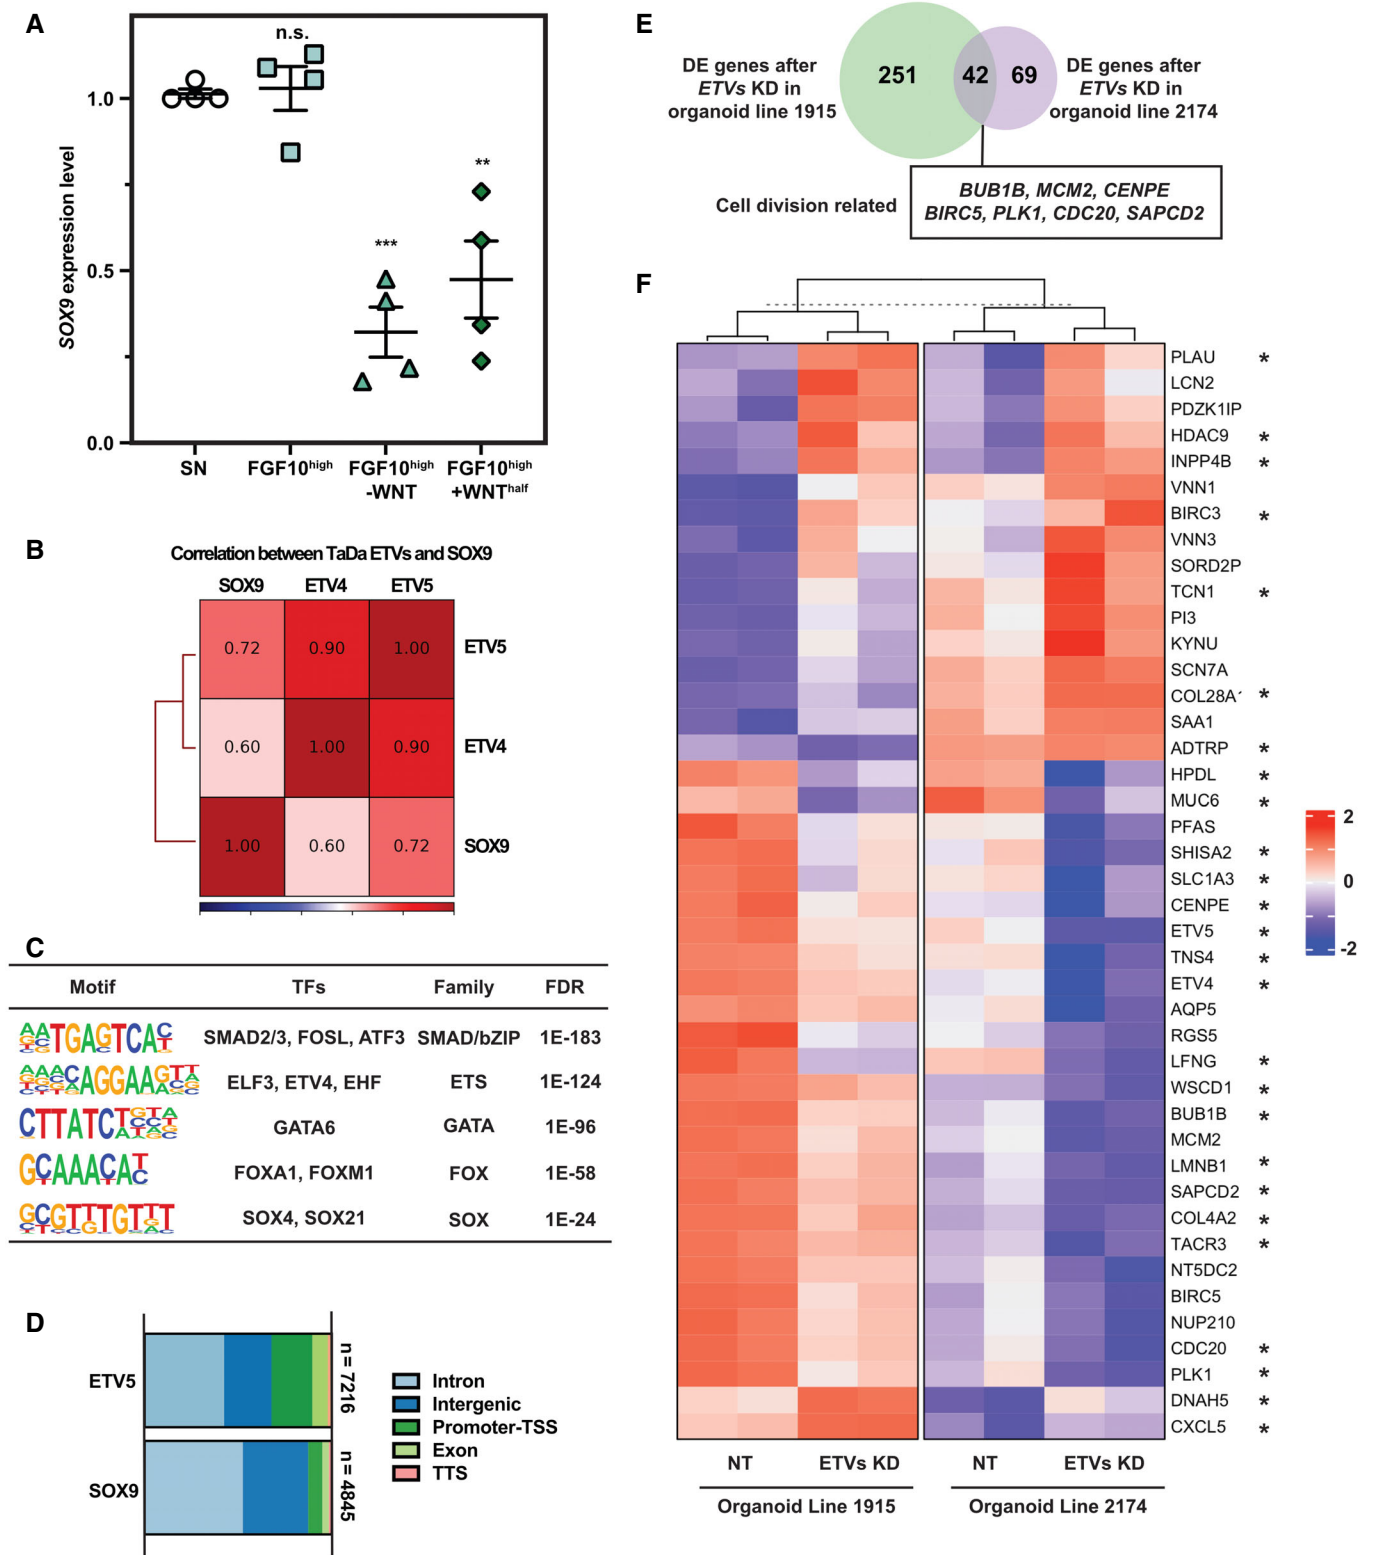

Figure EV5.

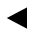**Figure EV5. Identification of direct ETV5 binding targets.**

- A qRT-PCR showing *SOX9* transcription 6 day after FGF10 supplementation (500 ng/ml), or FGF10 supplementation and removal of WNT activators.  $N = 4$  different organoid lines. Error bars: mean  $\pm$  SEM. Statistical analysis was using the two-tailed paired *t*-test. *P*-values are reported as follows: \*\* $P < 0.01$ ; \*\*\* $P < 0.001$ ; n.s. nonsignificant.
- B Pearson correlation of *SOX9*, *ETV4* and *ETV5* TaDa. *ETV4* and *ETV5* TaDa exhibited great consistency.
- C Motifs enriched in *ETV5* TaDa peaks. The ETS binding motif was highly enriched.
- D Genomic occupancy annotated features for *SOX9* and *ETV5* peaks.
- E Venn diagram showing overlap of differentially expressed genes after *ETV4* and *ETV5* double knock-down in two different parental organoid lines. Overlapping DE genes related to cell division by GO analysis are labelled in the box.
- F Heatmap showing expression level of all 42 DE genes after *ETV4*; *ETV5* double knock-down across different organoid lines. Directly regulated genes are marked by asterisks.

Source data are available online for this figure.
